# Supplementary material
Source: publisher figshare collection journal article supplement (https://karger.figshare.com/ndownloader/files/25818179)
Supplement: Supplementary file 1 [file 25818179]

**Supplementary table**

| Gestational age(week) | All birth average weight for gestational age | 10th centile | 90th centile | Gestational age of PE(week) | Birth average weight for early-onset PE |
| --- | --- | --- | --- | --- | --- |
| 22.00 | 750.00 | 750.00 | 750.00 | 22.00 | 750.00 |
| 23.00 | 1363.33 | 710.00 | 850.00 |  |  |
| 24.00 | 716.83 | 527.00 | 902.00 | 24.00 | 700.00 |
| 25.00 | 780.35 | 648.00 | 934.00 | 25.00 | 950.00 |
| 26.00 | 956.94 | 809.00 | 1103.00 | 26.00 | 1037.50 |
| 27.00 | 1073.68 | 900.00 | 1250.00 | 27.00 | 1036.67 |
| 28.00 | 1182.58 | 960.00 | 1500.00 | 28.00 | 1083.65 |
| 29.00 | 1340.34 | 1000.00 | 1650.00 | 29.00 | 1310.14 |
| 30.00 | 1487.99 | 1050.00 | 1850.00 | 30.00 | 1493.09 |
| 31.00 | 1667.41 | 1200.00 | 2100.00 | 31.00 | 1480.00 |
| 32.00 | 1806.81 | 1300.00 | 2240.00 | 32.00 | 1492.67 |
| 33.00 | 2004.71 | 1550.00 | 2477.00 | 33.00 | 1688.63 |
| 34.00 | 2301.80 | 1900.00 | 2700.00 | 34.00 | 2310.07 |
| 35.00 | 2547.31 | 2120.00 | 3000.00 |  |  |
| 36.00 | 2770.33 | 2350.00 | 3200.00 |  |  |
| 37.00 | 3037.54 | 2550.00 | 3522.00 | 37.00 | 3300.00 |

Comparison of the birth weight of all newborn average, 10th percentile, 90th percentile and average birth weight of newborns with early-onset preeclampsia
